# Supplementary material for: Isolation and mass spectrometry analysis of urinary extraexosomal proteins
Source: PubMed Central journal article supplement (PMC5090863; doi:10.1038/srep36331), 2016-11-02
Supplement: srep36331-s1.pdf [file srep36331-s1.pdf]

**Isolation and mass spectrometry analysis of urinary extraexosomal proteins**

Siri Hildonen, Ellen Skarpen, Trine Grønhaug Halvorsen, Léon Reubsæet

**Figure 1**

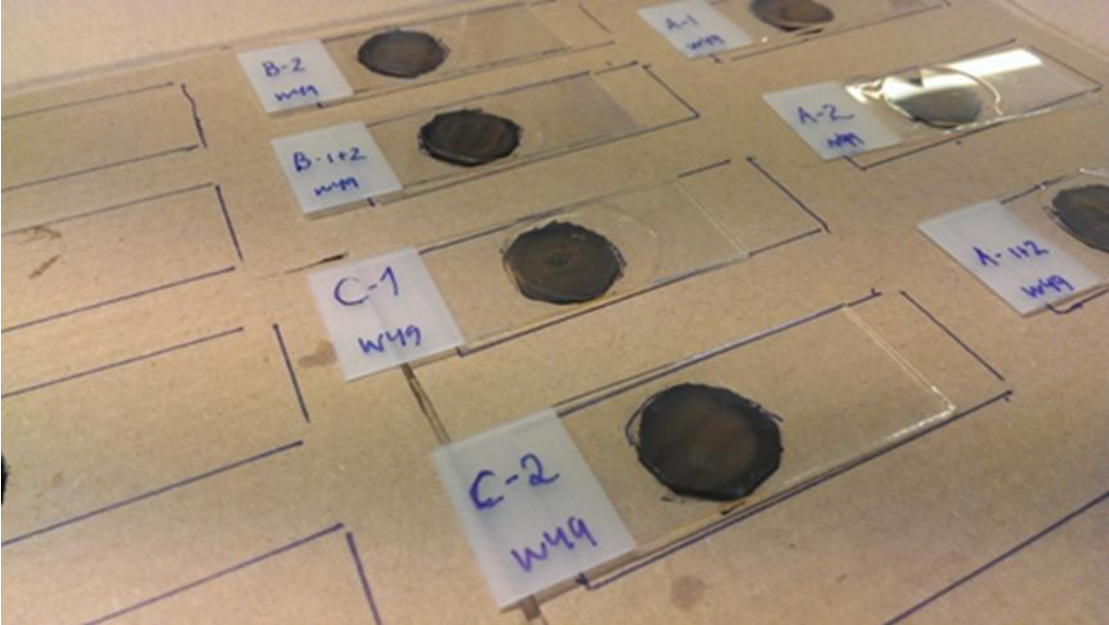

**Figure 2**

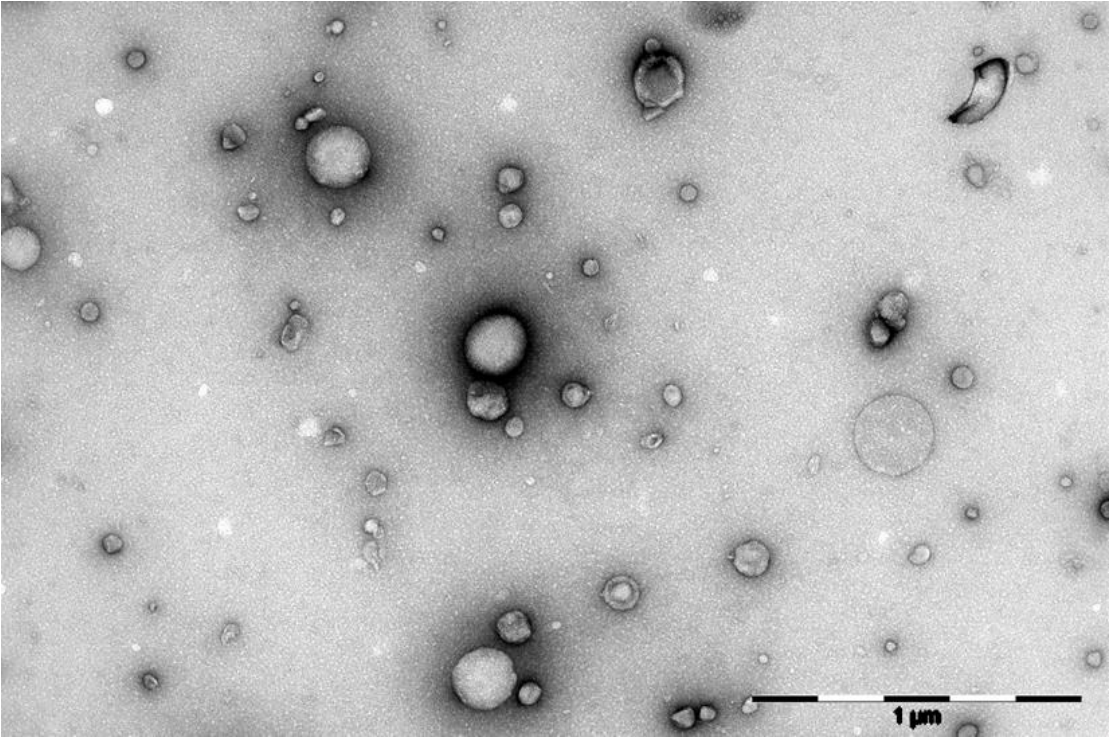

## **Supplementary legends**

**Figure 1.** The in-house device setup with magnets embedded in cardboard for mounting exosome-bead complexes onto microscope slides.

**Figure 2.** Transmission electron microscopy of of 100 kDa cutoff filtrate of urine

**Table 1.** Table of all protein hits and their coverage after searching LC-MS/MS raw data against a human database
